# Supplementary material for: Night Shift Work Increases the Risks of Multiple Primary Cancers in Women: A Systematic Review and Meta-analysis of 61 Articles
Source: Oxford University Press journal article supplement (doi:10.1158/1055-9965.epi-17-0221), 2018-01-01
Supplement: 10559965epi170221-sup-180081_3_supp_4316940_1xgl1j.docx [file 10559965epi170221-sup-180081_3_supp_4316940_1xgl1j.docx]

|  |  | **Supplementary table 1.** **ORs of the common cancers in women** | | | | | | | | | | | | |
| --- | --- | --- | --- | --- | --- | --- | --- | --- | --- | --- | --- | --- | --- | --- |
| **Cancer site** | | | | **Number of studies*** | **Number of cases/participants** |  | **Risk estimates** | | | |  | **Heterogeneity** | |  |
| **OR LCI UCI P** | | | |  | **P I2** | |
| unclassified cancer** | | | | 4 | 6178/133923 |  | 1.070 | 0.916 | 1.249 | 0.394 |  | 51.6% | 0.102 |  |
| breast cancer | | | | 49 | 93197/2882171 |  | 1.316 | 1.196 | 1.448 | 0.000 |  | 80.4% | 0.000 |  |
| digestive system cancer | | | | 23 | 2985/1317988 |  | 1.177 | 1.065 | 1.301 | 0.001 |  | 0.0% | 0.700 |  |
| skin cancer | | | | 7 | 524/1263882 |  | 1.408 | 1.024 | 1.934 | 0.035 |  | 64.7% | 0.009 |  |
| reproductive system cancer | | | ovarian | 8 | 3964/1509008 |  | 0.998 | 0.832 | 1.197 | 0.985 |  | 42.6% | 0.094 |  |
| uterine | 5 | 562/1214885 |  | 1.132 | 0.758 | 1.692 | 0.544 |  | 59.6% | 0.042 |
| cervical | 5 | 1315/1167636 |  | 0.984 | 0.832 | 1.163 | 0.849 |  | 0.0% | 0.548 |
| hematologic system cancer | | | | 9 | 2540/1161398 |  | 1.135 | 0.909 | 1.416 | 0.263 |  | 14.7% | 0.311 |  |
| endocrine system cancer | | | | 3 | 314/1299838 |  | 0.818 | 0.633 | 1.057 | 0.125 |  | 6.8% | 0.342 |  |
| lung cancer | | | | 6 | 2948/1244501 |  | 1.054 | 0.864 | 1.286 | 0.606 |  | 33.3% | 0.186 |  |
| nervous system cancer | | | | 4 | 38/1161398 |  | 0.900 | 0.638 | 1.270 | 0.550 |  | 0.0% | 0.981 |  |
| urinary system cancer | | | | 7 | 34/1161398 |  | 1.152 | 0.787 | 1.686 | 0.467 |  | 0.0% | 0.742 |  |
| bone cancer | | | | 1 | 3/8244 |  | 2.390 | 0.627 | 9.114 | 0.202 |  | — | — |  |
| soft tissue cancer | | | | 1 | 3/8244 |  | 0.970 | 0.257 | 3.662 | 0.964 |  | — | — |  |
| other cancers | | | | 4 | 23/1161398 |  | 0.797 | 0.498 | 1.274 | 0.342 |  | 0.0% | 0.429 |  |
|  |  | OR: odds ratio; LCI: low limit of 95% confidence interval; UCI: upper limit of 95% confidence interval; note:Brain cancer is included in nervous system cancer.  *Some enrolled articles discussed more than one type of cancer seperately, when calculating the number of studies, we took different cancers into consideration in one article.  ** There were four articles reported the standardized incidence ratio (SIR) for cancer overall among female night shifters and also reported on a number of different cancers, including e.g. breast cancer, colon cancer, cervix/uterus cancer and other cancers. In the table the four articles were not included in the item “unclassified cancer”, but the incidence risk of different cancers in each article was seperately included in corresponding items. | | | | | | | | | | | | |
