# Supplementary material for: Night Shift Work Increases the Risks of Multiple Primary Cancers in Women: A Systematic Review and Meta-analysis of 61 Articles
Source: Oxford University Press journal article supplement (doi:10.1158/1055-9965.epi-17-0221), 2018-01-01
Supplement: 10559965epi170221-sup-180081_3_supp_4316941_dxgldj.docx [file 10559965epi170221-sup-180081_3_supp_4316941_dxgldj.docx]

Supplementary figure legends

Supplementary figure 1. Forest plots of the association between night shift work and cancer risk of women. OR: odds ratio; CI: conﬁdence interval; I-squared, measure to quantify the degree of heterogeneity in meta-analyses. The squares and horizontal lines correspond to the study-speciﬁc OR and 95% CI. The area of the squares reﬂects the study speciﬁc weight. The diamond represents the pooled OR and 95% CI.

Supplementary figure 2. Begg’s funnel plot was used to assess potential publication bias. OR: odds ratio; Log OR is plotted versus standard error of Log OR for each enrolled study. Horizontal line stands for mean effect size. Each circle point represents a separate study. Potential publication bias was identified (p = 0.006) among all retrieved studies, whereas no publication bias was observed among studies on breast cancer (p = 0.208) ,which was separately shown in Figure S1 A and Figure S1 B.
