# Supplementary material for: Night Shift Work Increases the Risks of Multiple Primary Cancers in Women: A Systematic Review and Meta-analysis of 61 Articles
Source: Oxford University Press journal article supplement (doi:10.1158/1055-9965.epi-17-0221), 2018-01-01
Supplement: 10559965epi170221-sup-180081_3_supp_4316944_1xgl1j.docx [file 10559965epi170221-sup-180081_3_supp_4316944_1xgl1j.docx]

|  |  | **Supplementary table 2.** **ORs of the common cancers in female nurses** | | | | | | | | | | | |
| --- | --- | --- | --- | --- | --- | --- | --- | --- | --- | --- | --- | --- | --- |
| **Cancer site** | | | **Number of studies*** | **Weight(%)** | **Risk estimates** | | | |  | **Heterogeneity** | |  |
| **OR LCI UCI P** | | | |  | **P I2** | |
| breast cancer | | | 11 | 52.16 | 1.577 | 1.235 | 2.014 | 0.000 |  | 0.000 | 72.0% |  |
| digestive system cancers | | | 1 | 7.81 | 1.350 | 1.030 | 1.770 | 0.030 |  | — | — |  |
| reproductive system cancers | | | 2 | 11.24 | 1.100 | 0.606 | 1.996 | 0.754 |  | 0.035 | 77.5% |  |
| lung cancer | | | 1 | 9.69 | 1.280 | 1.070 | 1.531 | 0.007 |  | — | — |  |
| unclassified cancer | | | 1 | 11.70 | 1.080 | 1.029 | 1.134 | 0.002 |  | — | — |  |
| melanoma | | | 1 | 7.41 | 0.900 | 0.672 | 1.204 | 0.479 |  | — | — |  |
|  |  | OR: odds ratio; LCI: low limit of 95% confidence interval; UCI: upper limit of 95% confidence interval; NA: not available.  *Some enrolled articles discussed more than one type of cancer seperately, when calculating the number of studies, we took different cancer into  consideration in one article. | | | | | | | | | | | |
